# Supplementary material for: New Carbonate-Based Materials and Study of Cytotoxic Capacity in Cancer Cells
Source: MDPI journal article supplement (doi:10.3390/ijms24065546), 2023-03-14
Supplement: s1 [file s1]

## Supplementary data

# New Carbonate-Based Materials and Study of Cytotoxic Capacity in Cancer Cells

Nayara Niza-Pérez 1,†, Josefa Quiroz-Troncoso 2,3,†, Nicolás Alegría-Aravena 2,4,5, Santiago Gómez-Ruiz 1, Diana Díaz-García 1,\* and Carmen Ramírez-Castillejo 2,6,\*

1 COMET-NANO Group, Departamento de Biología y Geología, Física y Química Inorgánica, ESCET, Universidad Rey Juan Carlos, 28933 Madrid, Spain

2 Centro de Tecnología Biomédica (CTB), Departamento Biotecnología-B.V. ETSIAAB, Universidad Politécnica de Madrid, 28223 Madrid, Spain

3 Medicinal Gardens S.L. (Baía Food), 28008 Madrid, Spain

4 Grupo de Biología y Producción de Cérvidos, Instituto de Desarrollo Regional, Universidad de Castilla-La Mancha, 02006 Albacete, Spain

5 Asociación Española Contra el Cáncer (AECC)—Fundación Científica AECC, 02001 Albacete, Spain

6 Oncology Department, Instituto de Investigación Sanitaria San Carlos (IdISSC), 28040 Madrid, Spain

\* Correspondence: diana.diaz@urjc.es (D.D.-G.); mariadelcarmen.ramirez@upb.es (C.R.-C.); Tel.: +34-910679290 (C.R.-C.)

† These authors contributed equally to this work.

This supplementary data contains:

1) Table S1. Concentration of intracellular Mn and percentage of internalization in the three cell lines.

**Table S1.** Capacity of selectivity (internalization) of some studies materials measured by ICP.

| Material      | Cell lines                     |                           |                                |                           |                                |                           |
|---------------|--------------------------------|---------------------------|--------------------------------|---------------------------|--------------------------------|---------------------------|
|               | CT2A                           |                           | SKBR                           |                           | HEK-293T                       |                           |
|               | [Mn]<br>intracellular<br>(ppm) | % Real<br>Internalization | [Mn]<br>intracellular<br>(ppm) | % Real<br>Internalization | [Mn]<br>intracellular<br>(ppm) | % Real<br>Internalization |
| Mn-V-AP       | 4.00                           | 33.44                     | 3.80                           | 31.77                     | 4.00                           | 22.44                     |
| Mn-V-AP-cys25 | 4.20                           | 52.86                     | 4.10                           | 51.60                     | 4.10                           | 51.60                     |
